# Supplementary material for: PARP1 Deficiency Reduces Tumour Growth by Decreasing E2F1 Hyperactivation: A Novel Mechanism Beyond PARP Enzymatic Inhibition in the Treatment of Cancer
Source: Preprints.org preprint supplement (doi:10.20944/preprints202009.0114.v1), 2020-09-05
Supplement: Supplementary file 1 [file supplementary]

## Supplementary Figures

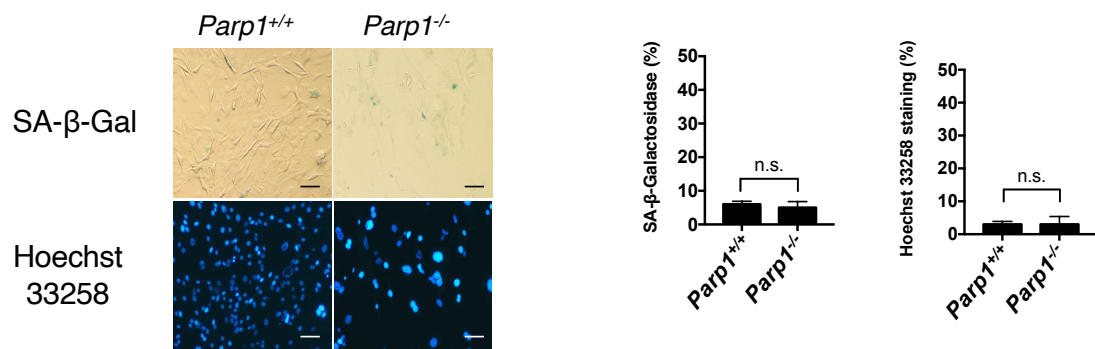

**Supplementary Figure 1.** The absence of PARP1 has no effect on senescence and apoptosis. Scale (40X) = 25  $\mu$ m.

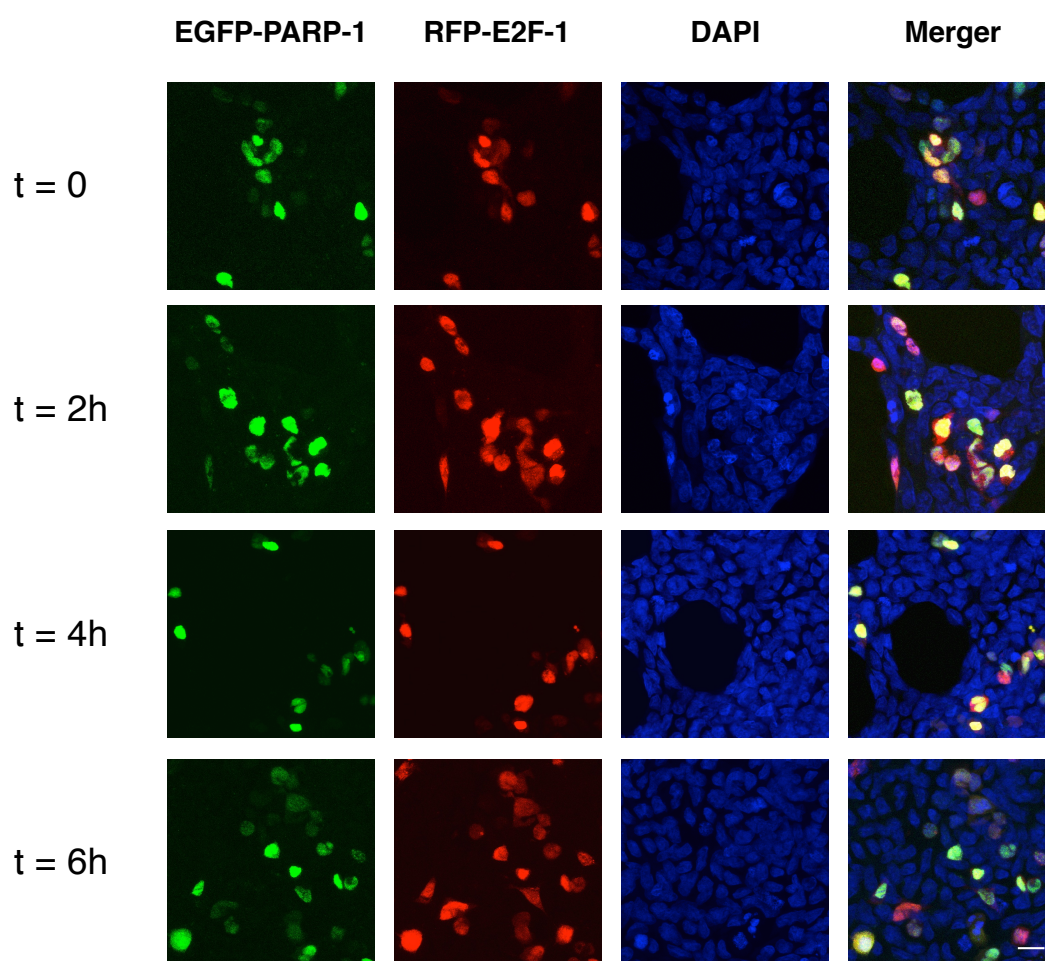

**Supplementary Figure 2.** Laser scanning confocal microphotographs of co-localization of both proteins at different times after block release by double thymidine treatment. Scale (40X) = 25  $\mu$ m.
